# Supplementary material for: Synergistic effect of built-in and polarized electric fields in BiFeO3/BiOI heterojunctions for efficient photocatalysis
Source: Royal Society of Chemistry journal article supplement (doi:10.1039/d5ce00041f), 2025-01-01
Supplement: d5ce00041f1.pdf [file d5ce00041f1.pdf]

# **Synergistic Effect of Built-in and Polarized Electric Fields in BiFeO<sub>3</sub>/BiOI Heterojunctions for Efficient Photocatalysis**

*Jiangwen Bai<sup>a,b</sup>, Jiamin Li<sup>b</sup>, Jimmeng Xiang<sup>b</sup>, Chongfeng Guo<sup>b\*</sup>*

*<sup>a</sup> Xi'an University of Finance and Economics, Xi'an 710100, China.*

*<sup>b</sup> State Key Laboratory of Photon-Technology in Western China Energy, Institute of Photonics & Photon-Technology, Northwest University, Xi'an, 710069, China;*

-----  
*\* To whom correspondence should be addressed*

*E-mail address: [guocf@nwu.edu.cn](mailto:guocf@nwu.edu.cn) (C. Guo)*

*Tel & Fax: ±86-29-88302661*
